# Supplementary material for: Lysozyme-sensitive plasmonic hydrogel nanocomposite for colorimetric dry-eye inflammation biosensing
Source: Royal Society of Chemistry journal article supplement (doi:10.1039/d4nr01701c), 2024-01-01
Supplement: d4nr01701c1.pdf [file d4nr01701c1.pdf]

**[Supplementary Information]**

**Lysozyme-sensitive plasmonic hydrogel nanocomposite  
for colorimetric dry-eye inflammation biosensing**

Yasamin Ziai,<sup>a</sup> Chiara Rinoldi,<sup>a</sup> Francesca Petronella,<sup>b</sup> Anna Zakrzewska,<sup>a</sup>  
Luciano De Sio,<sup>c</sup> Filippo Pierini<sup>a\*</sup>

- a. Department of Biosystems and Soft Matter, Institute of Fundamental Technological Research, Polish Academy of Sciences, Warsaw 02-106, Poland.
- b. Institute of Crystallography CNR-IC, National Research Council of Italy, Via Salaria Km 29,300, 00015, Monterotondo - Rome, Italy
- c. Department of Medico-Surgical Sciences and Biotechnologies, Sapienza University of Rome, Corso della Repubblica 79, 04100 Latina, Italy

\*corresponding author: fpierini@ippt.pan.pl

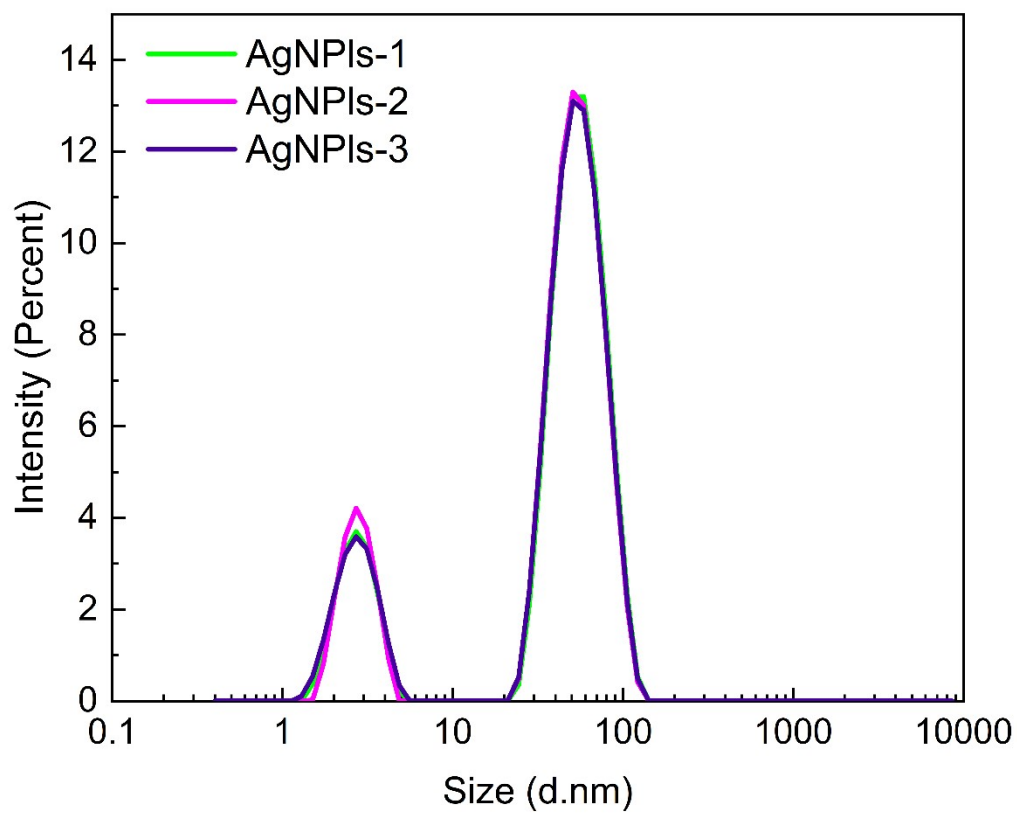

**Figure S1.** DLS measurements of the AgNPIs showing their average size before sonication (average size of  $57.2 \pm 0.53$  nm).

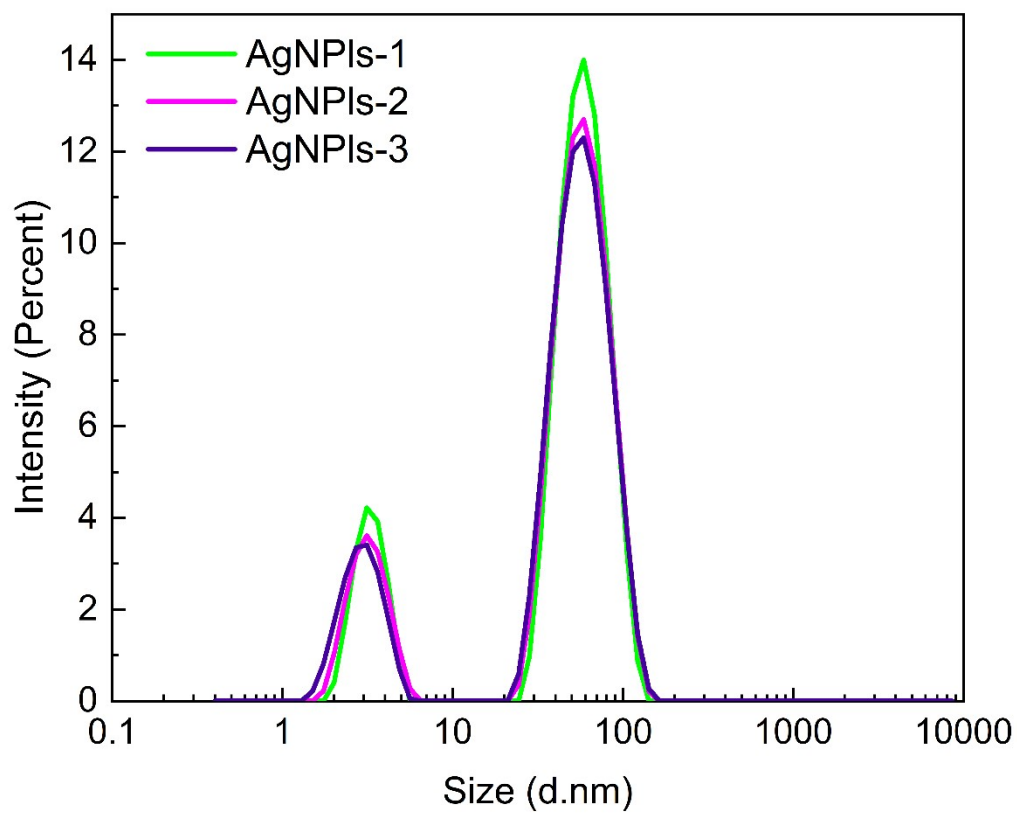

**Figure S2.** DLS measurements of the AgNPIS displaying their average size after sonication (average size of  $60.89 \pm 0.31$  nm), which proves the nanoparticles' stability will not change before and after the sonication.

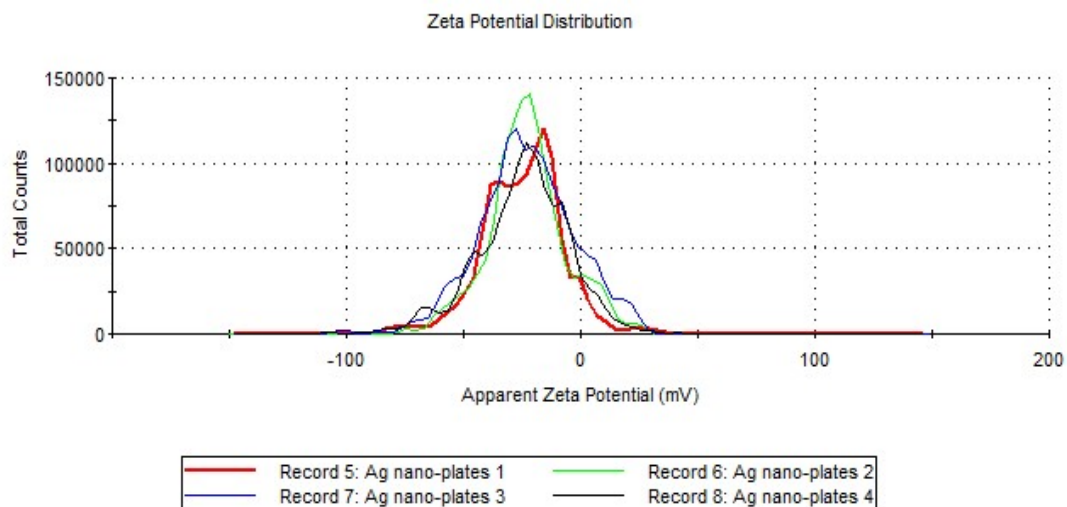

**Figure S3.** Zeta potential measurements showing the average surface charge of  $-23.85 \pm 1.10$  mV for AgNPIs before sonication, which proves the nanoparticles' stability without the need of sonication.

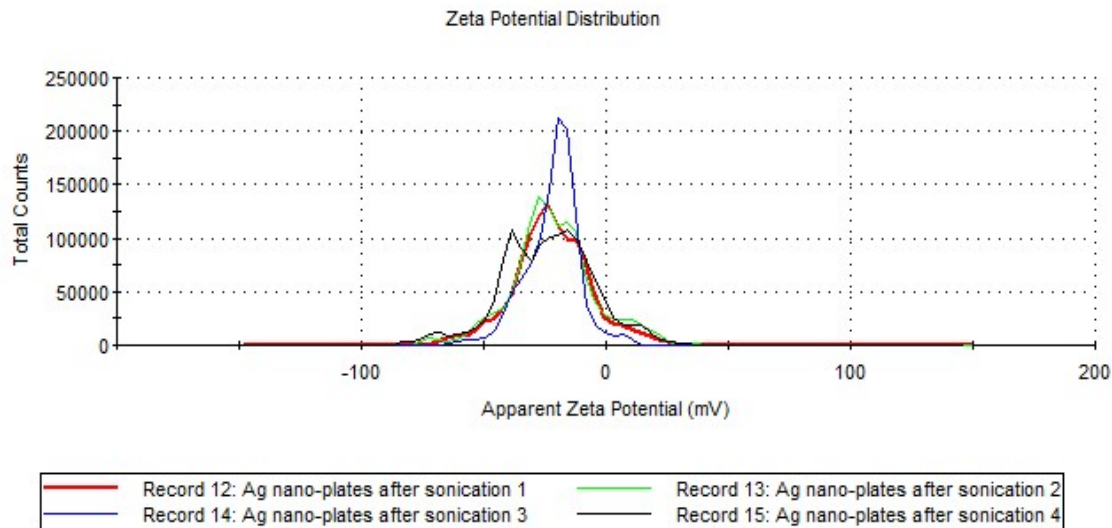

**Figure S4.** Zeta potential measurements of the AgNPIS after sonication show their average surface charge of  $-22.3 \pm 1.00$  mV, proving the nanoparticles' stability before and after the sonication.

**Table S1.** Average nanoparticle size and their distribution using DLS and nanoparticles surface charge using zeta potential methods before and after sonication, showing the stability and uniformity of the nanoparticles.

| Sample                   | Number of repetitions | Size distribution using DLS (nm) | Zeta potential (mV) |
|--------------------------|-----------------------|----------------------------------|---------------------|
| AgNpls before sonication | 4                     | $57.2 \pm 0.53$ nm               | $-23.85 \pm 1.10$   |
| AgNpls after sonication  | 4                     | $60.89 \pm 0.31$                 | $-22.3 \pm 1.00$    |

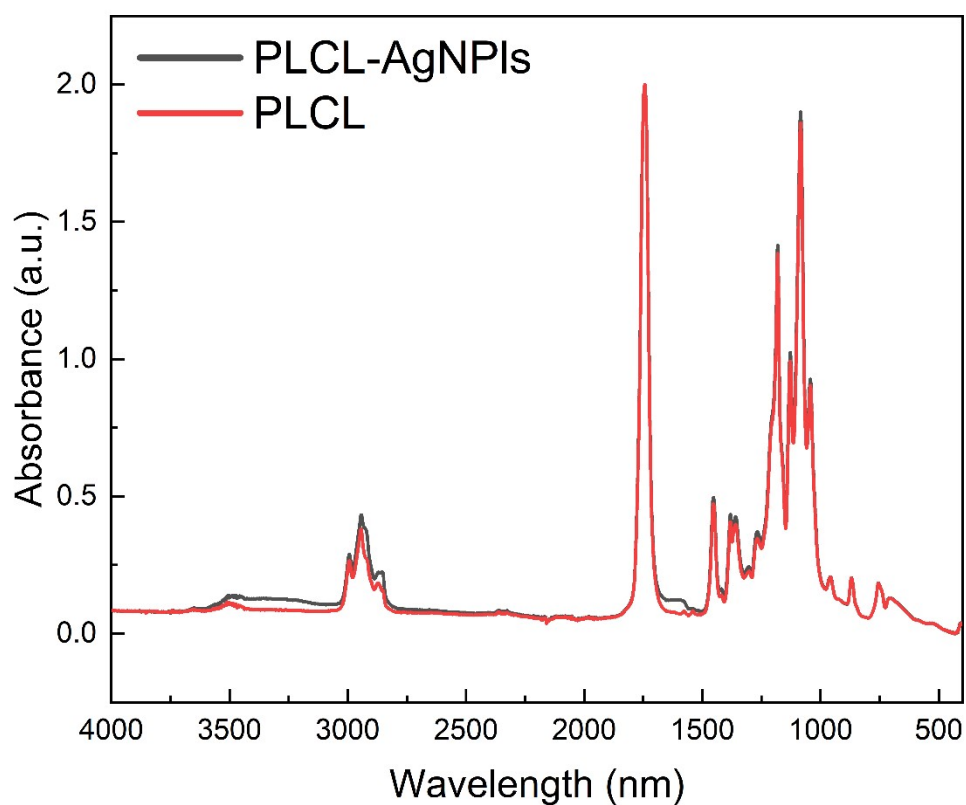

**Figure S5.** FT-IR spectrum of PLCL nanofibers before and after integrating silver nanoparticles in the system.

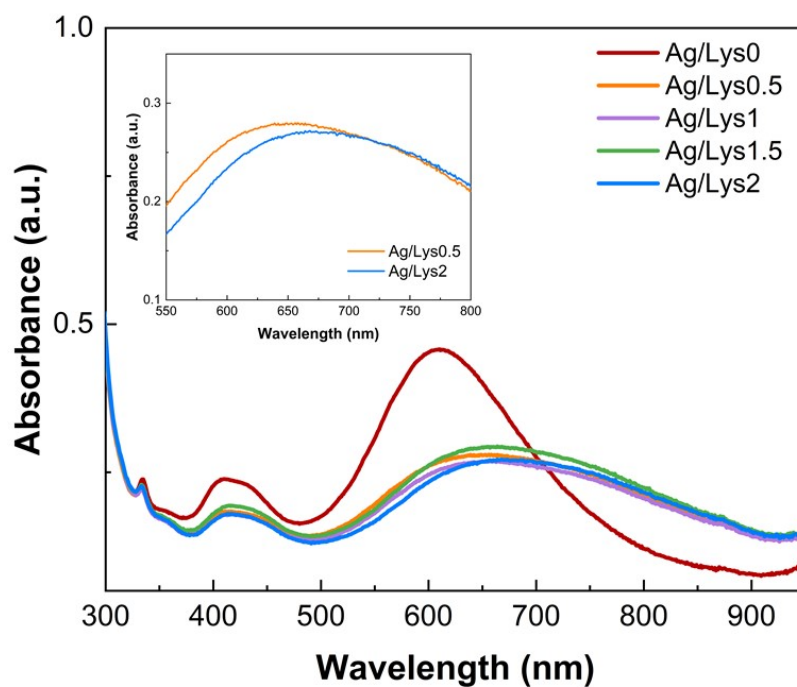

**Figure S6.** Absorbance spectra of the AgNPI sols after 10 minutes of incubation with lysozyme and NaCl.

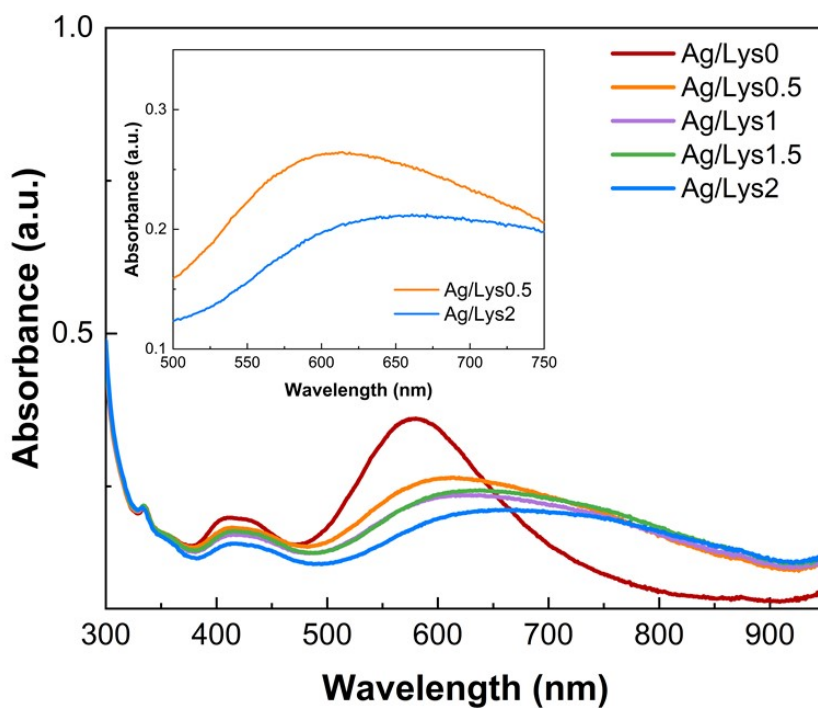

**Figure S7.** Absorbance spectra of the AgNPIs sols after 30 minutes of incubation with lysozyme and NaCl.

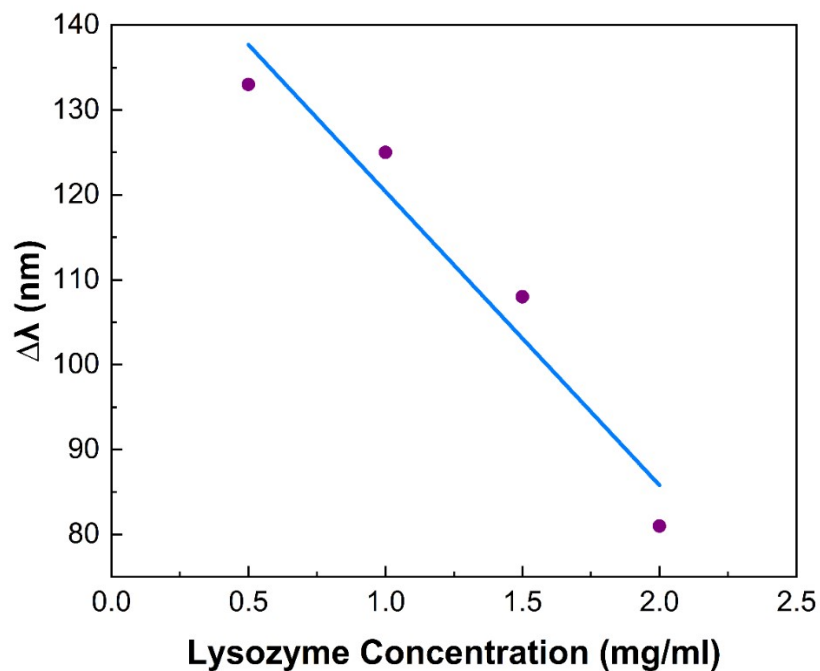

**Figure S8.** Linear correlation between the changes in the lysozyme concentration and changes in the wavelength.

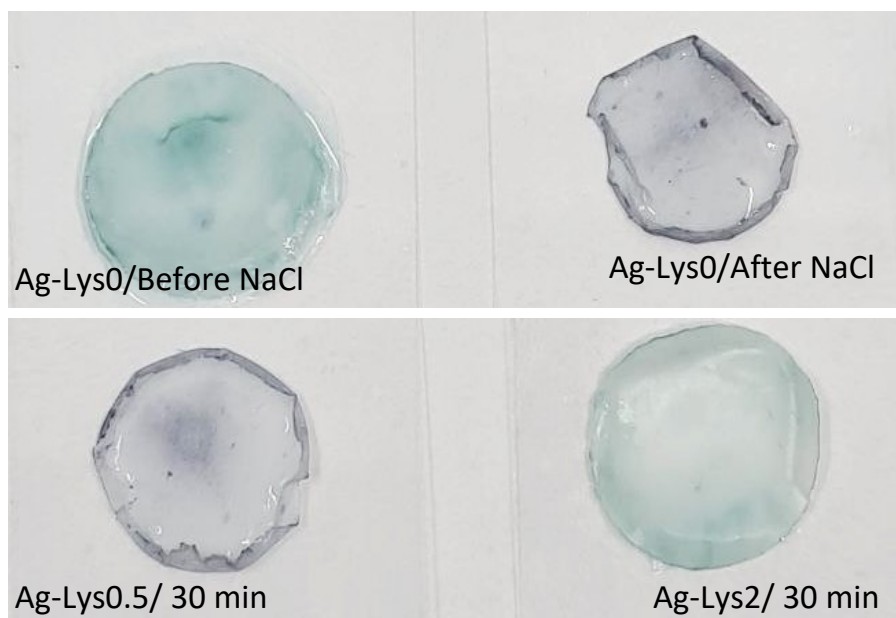

**Figure S9.** Photos of the color change of the samples before and after applying the lysozyme to the samples with and without NaCl. The color change for the samples in the non-healthy range of lysozyme, changing from blue to purple, confirms the potential detection by the naked eye.
